# Supplementary material for: Matrix Stiffness Influences Tubular Formation in Renal Tissue Engineering
Source: MDPI journal article supplement (doi:10.3390/app13074510), 2023-04-02
Supplement: s1 [file s1]

### Supplemental Data

**Figure S1:** Nominal Stress-Strain Curve for the different concentrations (1, 2, 3, and 5%) of Agarose gel.

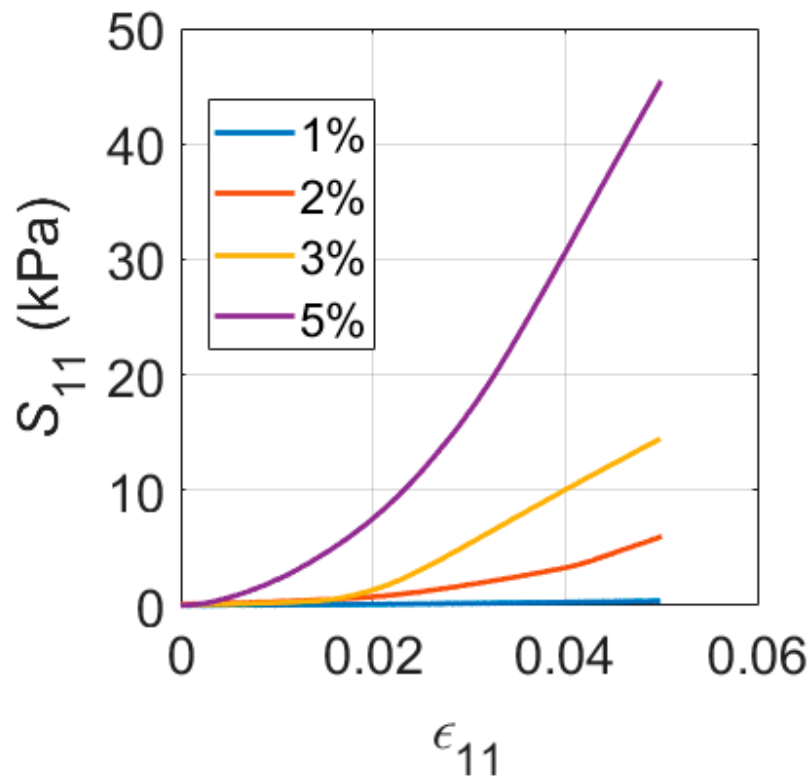

**Figure S2:** Force Displacement Plots for different PDMS substrates with different curing agent to pre-polymer ratio. Sample 1 = 1:5, Sample 2 = 1:10, Sample 3 = 1:15, Sample 4 = 1:20, Sample 5 = 1:30. The generated force displacement plots were used to establish the Young's moduli of the PDMS substrates.

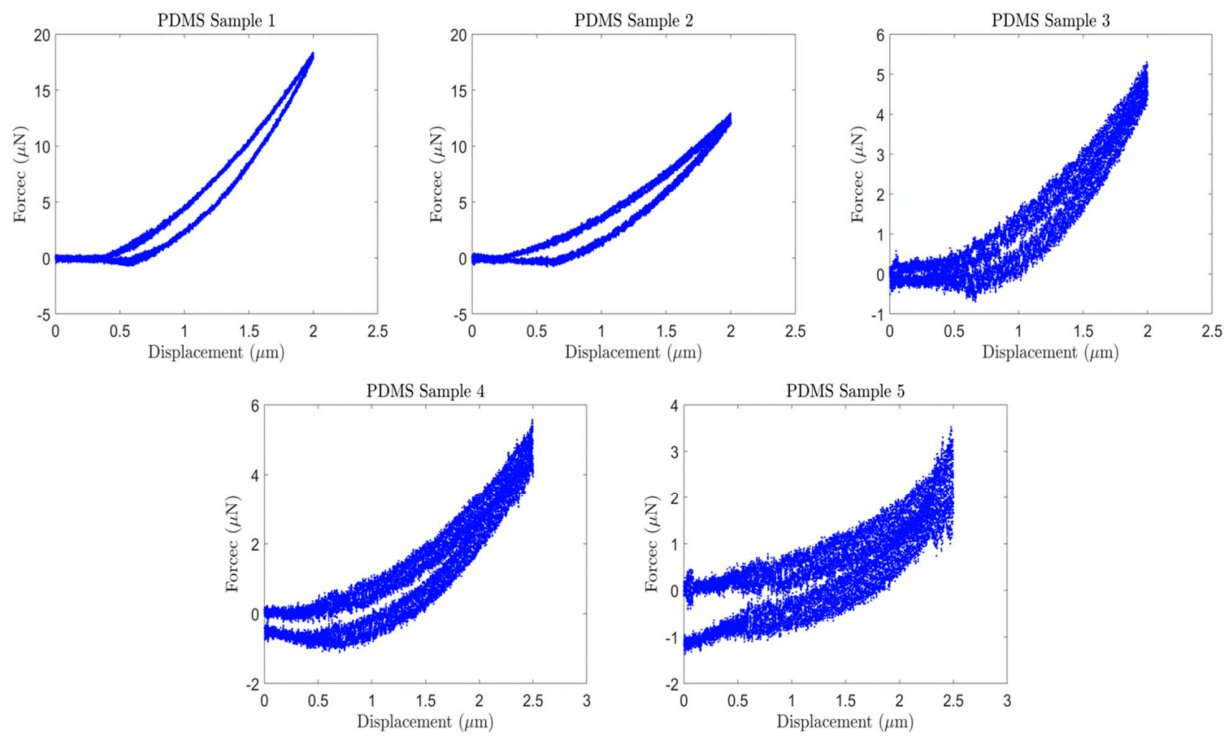

**Figure S3:** Cell seeding based on PDMS mold orientation during centrifugation. The mold orientation is represented as a blue rectangle. The “angle” (0, 45, or 90°) represents the angle between the mold direction and the direction of the centrifugal force (F) generated in the centrifuge (A = Axis of rotation of the centrifuge)

| Mold Orientation |                                                                                     | Cell seeding                                                                         |                                                                                       |
|------------------|-------------------------------------------------------------------------------------|--------------------------------------------------------------------------------------|---------------------------------------------------------------------------------------|
|                  |                                                                                     | PDMS                                                                                 | Agarose                                                                               |
| 90°              | 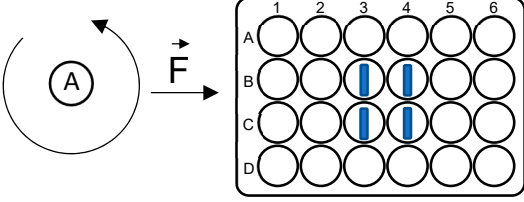   |    |    |
| 45°              |  |  |   |
| 0°               |  |  |  |
