# Supplementary material for: Matrix Stiffness Influences Tubular Formation in Renal Tissue Engineering
Source: MDPI journal article supplement (doi:10.3390/app13074510), 2023-04-02
Supplement: s1 [file s1]

Archive with 1 entries (1 files):
- applsci-2065758-supplementary.pdf
